# Supplementary material
Source: publisher site journal article supplement (https://www.dovepress.com/get_supplementary_file.php?f=275234.docx)
Supplement: Supplementary file 1 [file get_supplementary_file.php]

Data are presented as numbers (percentages).

| Table S1: Prevalence of comorbidities of the participants with COPD and NON-COPD | | | |
| --- | --- | --- | --- |
| Comorbidities | COPD (n=528) | NON-COPD (n=8184) | *p* |
| Heart diseases  Yes  No | 11 (2.4)  441 (97.6) | 31 (0.4)  8099 (99.6) | <0.001 |
| Stroke  Yes  No | 11 (2.4)  441 (97.6) | 31 (0.4)  8099 (99.6) | <0.001 |
| Diabetes  Yes  No | 78 (17.2)  375 (82.8) | 467 (4.7)  7644 (95.3) | <0.001 |
| Osteoporosis  Yes  No | 79 (15.5)  399 (83.5) | 317 (3.9)  7750 (96.1) | <0.001 |
| Diseases of the back  Yes  No | 115 (23.8)  368 (76.2) | 841 (10.5)  7201 (89.5) | <0.001 |
| Cancer  Yes  No | 28 (6)  441 (94) | 107 (1.3)  7933 (98.7) | <0.001 |
| Psychiatric disorders  Yes  No | 67 (14.3)  400 (85.7) | 392 (4.9)  7598 (95.1) | <0.001 |
| Osteoarthritis  Yes  No | 244 (51)  234 (49) | 2000 (24.7)  6096 (75.3) | <0.001 |
| Rheumatoid arthritis  Yes  No | 84 (18.9)  361 (81.1) | 559 (7)  7417 (93) | <0.001 |

Table S2: Multiple linear regression on the associations between COPD and pain intensity.

|  | β coefficient | 95% CI | *p* |
| --- | --- | --- | --- |
| *Adjusted model*  COPD | 0.51 | 0.16; 0.87 | 0.004 |
| Gender (men) | -0.33 | -0.52; -0.14 | <0.001 |
| Living with partner | -0.22 | -0.43; -0.01 | 0.039 |
| Educational level ≥13 years | -0.25 | -0.36; -0.14 | <0.001 |
| BMI (kg/m2)  Current smoker | 0.03  0.46 | 0.01; 0.04  0.23, 0.69 | 0.004  <0.001 |
| Physical inactive  High alcohol intake | 0.53  0.29 | 0.31; 0.75  0.06; 0.52 | <0.001  0.013 |
| Sleep-disturbance | 0.91 | 0.72; 1.09 | <0.001 |
| ≥1 Painful comorbidity | 0.76 | 0.57; 0.96 | <0.001 |

Table S3: Multiple logistic regression on pain intensity and odds of being physical active among individuals with COPD.

|  | OR | 95% CI | *p* |
| --- | --- | --- | --- |
| *Adjusted model*  Pain intensity | 0.72 | 0.59; 0.86 | <0.001 |
| Age (years) | 0.98 | 0.95; 1.03 | 0.544 |
| Gender (men) | 1.34 | 0.61; 2.92 | 0.458 |
| Living with partner | 1.12 | 0.51; 2.43 | 0.783 |
| Educational level ≥13 years | 1.18 | 0.87; 1.61 | 0.294 |
| BMI (kg/m2) | 0.92 | 0.88; 0.98 | 0.011 |
| Current smoker | 0.53 | 0.23; 1.23 | 0.140 |
| High alcohol intake | 0.99 | 0.42; 2.30 | 0.972 |
| Sleep-disturbance | 0.96 | 0.41; 2.22 | 0.918 |
| ≥1 painful comorbidity | 0.50 | 0.18; 1.41 | 0.188 |
